# Supplementary material
Source: Springer Nature journal article supplement (https://www.springermedizin.de/resource/supplementary/12884_2012_889_MOESM1_ESM.pdf/9458440)
Supplement: MOESM1 [file 9458440]

Frequency

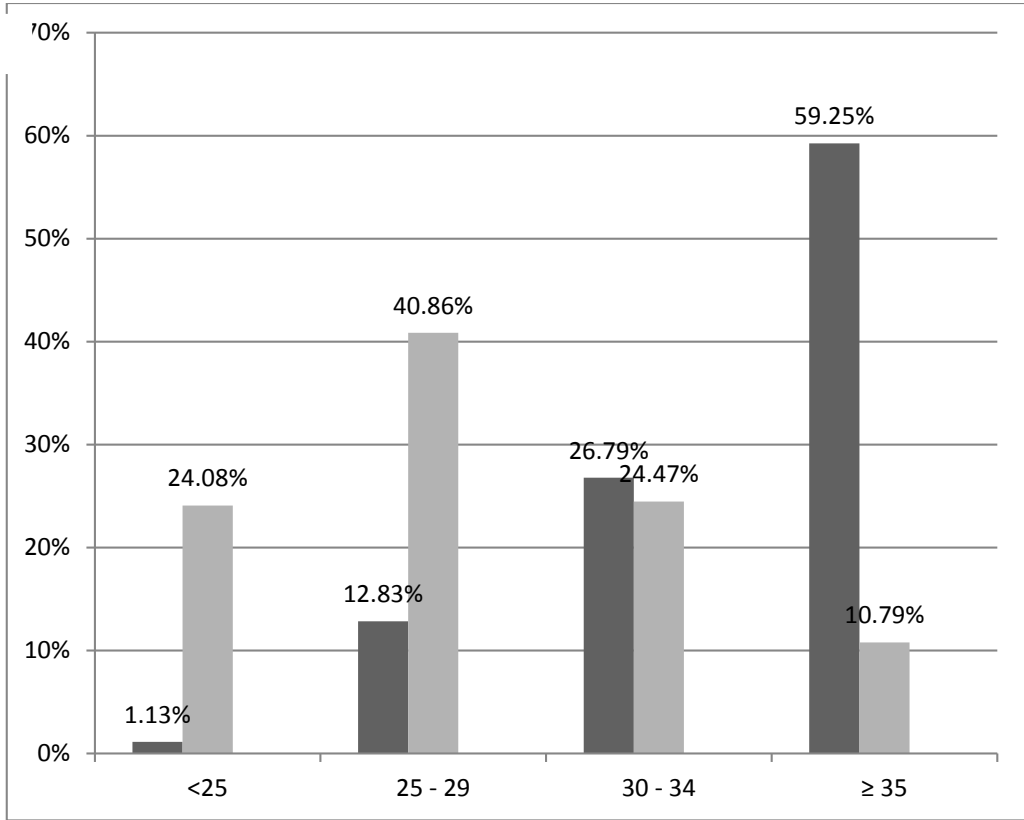

Age group (years)

**PARITY:**

■ Multipara

■ Grand multipara

**MEAN age in years:**

Total = 29.76±5.76

Grand multipara = 35.15±4.8

Multipara = 27.86±4.8
